# Supplementary material for: Distinct BMP-Smad Signaling Outputs Confer Diverse Functions in Dental Mesenchyme
Source: Research Square preprint supplement (doi:10.21203/rs.3.rs-5188541/v1), 2024-11-05
Supplement: Supplementary file 1 [file b2d639f222cbacedea67f8c0.docx]

**Supplemental Table 1**

**Probe list for RNAscope *in situ* hybridization**

| **Probe** | **Source** | **Identifier** |
| --- | --- | --- |
| Mm-Tgfβ1 | Advanced Cell Diagnostics | Cat No. 407751 |
| Mm-Tgfβ3 | Advanced Cell Diagnostics | Cat No. 406211 |
| Mm-Tgfβr1 | Advanced Cell Diagnostics | Cat No. 406201 |
| Mm-Inhba | Advanced Cell Diagnostics | Cat No. 455871 |

**Primer sequences for CUT&RUN-qPCR**

| **Gene** | **Primer Sequences** |
| --- | --- |
| *Nefl* | Forward: 5'-CAAAGTGGGTGATTGCTGCT-3' |
| Reverse: 5'-CGTATTGAGGATTCGCAGCC-3' |
| *Wnt3* | Forward: 5'-GAAAAGAGGCAAGGCAGAGG-3' |
| Reverse: 5'-CCACCCCTTTCCCTCTTTCT-3' |
